# Supplementary material
Source: MDPI journal article supplement (https://www.mdpi.com/2076-3417/12/2/784)
Supplement: s1 [file s1]

## Supplementary Material

### Applied Sciences

#### Chemical characterisation, antioxidant and antibacterial activities of *Pinus pinaster* Ait. and *Pinus pinea* L. bark polar extracts: prospecting forestry by-products as renewable sources of bioactive compounds

Patrícia A. B. Ramos<sup>1,2</sup>, Carla Pereira<sup>3</sup>, Ana Peixoto Gomes<sup>3</sup>, Rodrigo T. Neto<sup>1</sup>, Adelaide Almeida<sup>3</sup>, Sónia A. O. Santos<sup>1,\*</sup>, Artur M. S. Silva<sup>2</sup>, and Armando J. D. Silvestre<sup>1</sup>

<sup>1</sup> CICECO—Aveiro Institute of Materials, Department of Chemistry, University of Aveiro, 3810-193 Aveiro, Portugal; patriciaaramos@ua.pt (P.A.B.R.); rtneto@ua.pt (R.T.N.); armsil@ua.pt (A.J.D.S.)

<sup>2</sup> LAQV-REQUIMTE, Department of Chemistry, University of Aveiro, 3810-193 Aveiro, Portugal; artur.silva@ua.pt

<sup>3</sup> CESAM—Centre for Environmental and Marine Studies, Department of Biology, University of Aveiro, 3810-193 Aveiro, Portugal; csgp@ua.pt (C.P.); ana.peixoto@ua.pt (A.P.G.); aalmeida@ua.pt (A.A.)

\* Correspondence: santos.sonia@ua.pt; Tel.: + 351-234-370-711

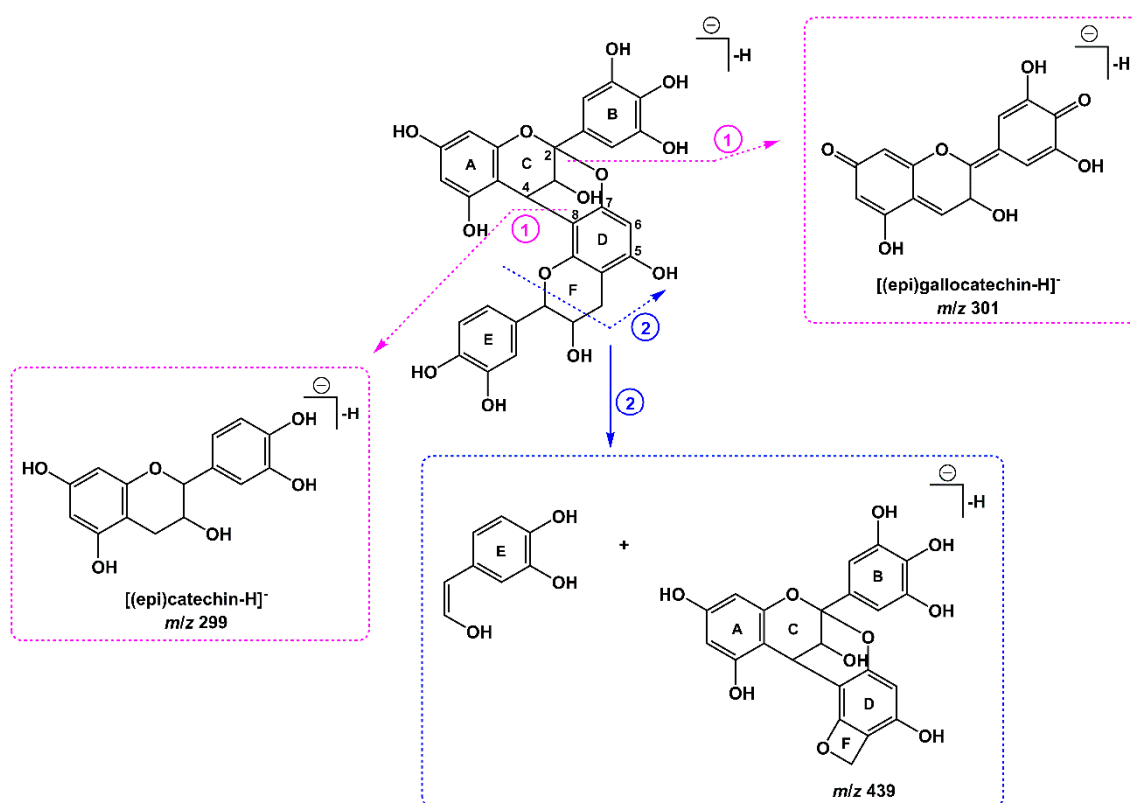

**Figure S1.** Mass fragmentation of (epi)gallocatechin-(2→O7, 4→8)-(epi)catechin in the negative ionisation mode.

**Table S1.** *S. aureus* counts after application of *Pinus pinaster* Ait. and *Pinus pinea* L. bark polar extracts. (a) *S. aureus* control: The bacterial control was only inoculated with *E. coli*; (b) Solvent control: The solvent control represents the bacterial growth under 12.5% (v/v) ethanol; (c) *Pinus pinaster* Ait. extract: The results represent the effect of *P. pinaster* Ait. bark polar extract against the growth of *S. aureus* and (d) *Pinus pinea* L. extract: The results represent the effect of *P. pinea* L. bark polar extract against the growth of *S. aureus*. *Pinus* spp. bark polar extracts were prepared in triplicate (samples 1-3). Each sample was evaluated three times (assay 1- 2) in different periods to secure independent replication. with three replicates (R1-R3) for each concentration. The results represent the mean of the three independent experiments in the three samples studied and their standard deviations.

**(a) *S. aureus* control**

|                          | Number of colonies |    |    |          |    |    |          |    |    | Average | Dilution | Dilution factor | CFU mL <sup>-1</sup> | log (CFU mL <sup>-1</sup> ) | Average log (CFU mL <sup>-1</sup> ) | Standard derivation |
|--------------------------|--------------------|----|----|----------|----|----|----------|----|----|---------|----------|-----------------|----------------------|-----------------------------|-------------------------------------|---------------------|
|                          | Sample 1           |    |    | Sample 2 |    |    | Sample 3 |    |    |         |          |                 |                      |                             |                                     |                     |
| <i>S. aureus</i> control | R1                 | R2 | R3 | R1       | R2 | R3 | R1       | R2 | R3 |         |          |                 |                      |                             |                                     |                     |
| Assay 1                  | 4                  | 5  | 8  | 30       | 20 | 32 | 36       | 47 | 39 | 24.56   | 100000   | 100             | 2.46E+08             | 8.39                        | 8.43831                             | 0.04184             |
| Assay 2                  | 24                 | 24 | 13 | 11       | 15 | 18 | 51       | 54 | 53 | 29.22   | 100000   | 100             | 2.92E+08             | 8.47                        |                                     |                     |
| Assay 3                  | 10                 | 9  | 13 | 22       | 26 | 24 | 49       | 55 | 51 | 28.78   | 100000   | 100             | 2.88E+08             | 8.46                        |                                     |                     |

**(b) Solvent control**

|                      | Number of colonies |    |    |          |    |    |          |    |    | Average | Dilution | Dilution factor | CFU mL <sup>-1</sup> | log (CFU mL <sup>-1</sup> ) | Average log (CFU mL <sup>-1</sup> ) | Standard derivation |
|----------------------|--------------------|----|----|----------|----|----|----------|----|----|---------|----------|-----------------|----------------------|-----------------------------|-------------------------------------|---------------------|
|                      | Sample 1           |    |    | Sample 2 |    |    | Sample 3 |    |    |         |          |                 |                      |                             |                                     |                     |
| Solvent 12.5 % (v/v) | R1                 | R2 | R3 | R1       | R2 | R3 | R1       | R2 | R3 |         |          |                 |                      |                             |                                     |                     |
| Assay 1              | 3                  | 2  | 5  | 17       | 15 | 14 | 27       | 29 | 31 | 15.89   | 100000   | 100             | 1.59E+08             | 8.20                        | 8.34239                             | 0.13813             |
| Assay 2              | 5                  | 6  | 5  | 12       | 9  | 12 | 54       | 52 | 46 | 22.33   | 100000   | 100             | 2.23E+08             | 8.35                        |                                     |                     |
| Assav 3              | 29                 | 33 | 25 | 16       | 12 | 13 | 47       | 44 | 51 | 30.00   | 100000   | 100             | 3.00E+08             | 8.48                        |                                     |                     |

(c) *Pinus pinaster* Ait. extract

| Sample 1 (mg mL <sup>-1</sup> ) | Number of colonies (assay 1) |    |    | Average | Dilution | Dilution factor | CFU mL <sup>-1</sup> | log (CFU mL <sup>-1</sup> ) |
|---------------------------------|------------------------------|----|----|---------|----------|-----------------|----------------------|-----------------------------|
|                                 | R1                           | R2 | R3 |         |          |                 |                      |                             |
| 25                              | 0                            | 0  | 0  | 0       | 1        | 100             | 0                    | 0                           |
| 12.5                            | 0                            | 0  | 0  | 0       | 1        | 100             | 0                    | 0                           |
| 6.25                            | 4                            | 3  | 1  | 2.67    | 1        | 100             | 2.67E+02             | 2.43                        |
| 3.13                            | 9                            | 12 | 11 | 10.67   | 10       | 100             | 1.07E+04             | 4.03                        |
| 1.56                            | 32                           | 27 | 31 | 30.00   | 10       | 100             | 3.00E+04             | 4.48                        |
| 0.78                            | 21                           | 24 | 25 | 23.33   | 100      | 100             | 2.33E+05             | 5.37                        |
| 0.39                            | 11                           | 9  | 5  | 8.33    | 100000   | 100             | 8.33E+07             | 7.92                        |

| Sample 1 (mg mL <sup>-1</sup> ) | Number of colonies (assay 2) |    |    | Average | Dilution | Dilution factor | CFU mL <sup>-1</sup> | log (CFU mL <sup>-1</sup> ) |
|---------------------------------|------------------------------|----|----|---------|----------|-----------------|----------------------|-----------------------------|
|                                 | R1                           | R2 | R3 |         |          |                 |                      |                             |
| 25                              | 0                            | 0  | 0  | 0       | 1        | 100             | 0                    | 0                           |
| 12.5                            | 1                            | 0  | 0  | 0.33    | 1        | 100             | 3.33E+01             | 1.52                        |
| 6.25                            | 38                           | 41 | 34 | 37.67   | 1        | 100             | 3.77E+03             | 3.58                        |
| 3.13                            | 13                           | 9  | 16 | 12.67   | 100      | 100             | 1.27E+05             | 5.10                        |
| 1.56                            | 7                            | 9  | 11 | 9.00    | 1000     | 100             | 9.00E+05             | 5.95                        |
| 0.78                            | 45                           | 46 | 46 | 45.67   | 10000    | 100             | 4.57E+07             | 7.66                        |
| 0.39                            | 31                           | 28 | 34 | 31.00   | 100000   | 100             | 3.10E+08             | 8.49                        |

| Sample 1 (mg mL <sup>-1</sup> ) | Number of colonies (assay 3) |    |    | Average | Dilution | Dilution factor | CFU mL <sup>-1</sup> | log (CFU mL <sup>-1</sup> ) |
|---------------------------------|------------------------------|----|----|---------|----------|-----------------|----------------------|-----------------------------|
|                                 | R1                           | R2 | R3 |         |          |                 |                      |                             |
| 25                              | 0                            | 0  | 0  | 0       | 1        | 100             | 0                    | 0                           |
| 12.5                            | 1                            | 0  | 0  | 0.33    | 1        | 100             | 3.33E+01             | 1.52                        |
| 6.25                            | 52                           | 44 | 50 | 48.67   | 1        | 100             | 4.87E+03             | 3.69                        |
| 3.13                            | 28                           | 19 | 13 | 20.00   | 100      | 100             | 2.00E+05             | 5.30                        |
| 1.56                            | 11                           | 9  | 11 | 10.33   | 1000     | 100             | 1.03E+06             | 6.01                        |
| 0.78                            | 21                           | 22 | 18 | 20.33   | 10000    | 100             | 2.03E+07             | 7.31                        |
| 0.39                            | 7                            | 8  | 10 | 8.33    | 100000   | 100             | 8.33E+07             | 7.92                        |

|                                 | Number of colonies (assay 1) |    |    | Average | Dilution | Dilution factor | CFU mL <sup>-1</sup> | log (CFU mL <sup>-1</sup> ) |
|---------------------------------|------------------------------|----|----|---------|----------|-----------------|----------------------|-----------------------------|
| Sample 2 (mg mL <sup>-1</sup> ) | R1                           | R2 | R3 |         |          |                 |                      |                             |
| 25                              | 0                            | 0  | 0  | 0       | 1        | 100             | 0                    | 0                           |
| 12.5                            | 0                            | 0  | 0  | 0       | 1        | 100             | 0                    | 0                           |
| 6.25                            | 11                           | 7  | 8  | 8.67    | 10       | 100             | 8.67E+03             | 3.94                        |
| 3.13                            | 9                            | 8  | 9  | 8.67    | 10000    | 100             | 8.67E+06             | 6.94                        |
| 1.56                            | 23                           | 15 | 20 | 19.33   | 10000    | 100             | 1.93E+07             | 7.29                        |
| 0.78                            | 34                           | 35 | 25 | 31.33   | 10000    | 100             | 3.13E+07             | 7.50                        |
| 0.39                            | 9                            | 9  | 7  | 8.33    | 100000   | 100             | 8.33E+07             | 7.92                        |

|                                 | Number of colonies (assay 2) |    |    | Average | Dilution | Dilution factor | CFU mL <sup>-1</sup> | log (CFU mL <sup>-1</sup> ) |
|---------------------------------|------------------------------|----|----|---------|----------|-----------------|----------------------|-----------------------------|
| Sample 2 (mg mL <sup>-1</sup> ) | R1                           | R2 | R3 |         |          |                 |                      |                             |
| 25                              | 0                            | 0  | 0  | 0       | 1        | 100             | 0                    | 0                           |
| 12.5                            | 0                            | 0  | 0  | 0       | 1        | 100             | 0                    | 0                           |
| 6.25                            | 34                           | 23 | 27 | 28.00   | 10       | 100             | 2.80E+04             | 4.45                        |
| 3.13                            | 63                           | 50 | 58 | 57.00   | 1000     | 100             | 5.70E+06             | 6.76                        |
| 1.56                            | 11                           | 9  | 12 | 10.67   | 10000    | 100             | 1.07E+07             | 7.03                        |
| 0.78                            | 31                           | 30 | 34 | 31.67   | 10000    | 100             | 3.17E+07             | 7.50                        |
| 0.39                            | 13                           | 12 | 10 | 11.67   | 100000   | 100             | 1.17E+08             | 8.07                        |

|                                 | Number of colonies (assay 3) |    |    | Average | Dilution | Dilution factor | CFU mL <sup>-1</sup> | log (CFU mL <sup>-1</sup> ) |
|---------------------------------|------------------------------|----|----|---------|----------|-----------------|----------------------|-----------------------------|
| Sample 2 (mg mL <sup>-1</sup> ) | R1                           | R2 | R3 |         |          |                 |                      |                             |
| 25                              | 0                            | 0  | 0  | 0       | 1        | 100             | 0                    | 0                           |
| 12.5                            | 0                            | 0  | 0  | 0       | 1        | 100             | 0                    | 0                           |
| 6.25                            | 27                           | 35 | 32 | 31.33   | 10       | 100             | 3.13E+04             | 4.50                        |
| 3.13                            | 54                           | 49 | 48 | 50.33   | 1000     | 100             | 5.03E+06             | 6.70                        |
| 1.56                            | 12                           | 16 | 20 | 16.00   | 10000    | 100             | 1.60E+07             | 7.20                        |
| 0.78                            | 35                           | 40 | 33 | 36.00   | 10000    | 100             | 3.60E+07             | 7.56                        |
| 0.39                            | 20                           | 31 | 27 | 26.00   | 100000   | 100             | 2.60E+08             | 8.41                        |

|                                 | Number of colonies (assay 1) |    |    | Average | Dilution | Dilution factor | CFU mL <sup>-1</sup> | log (CFU mL <sup>-1</sup> ) |
|---------------------------------|------------------------------|----|----|---------|----------|-----------------|----------------------|-----------------------------|
| Sample 3 (mg mL <sup>-1</sup> ) | R1                           | R2 | R3 |         |          |                 |                      |                             |
| 25                              | 0                            | 0  | 0  | 0       | 1        | 100             | 0                    | 0                           |
| 12.5                            | 24                           | 28 | 31 | 27.67   | 10       | 100             | 2.77E+04             | 4.44                        |
| 6.25                            | 16                           | 21 | 24 | 20.33   | 100      | 100             | 2.03E+05             | 5.31                        |
| 3.13                            | 45                           | 37 | 40 | 40.67   | 1000     | 100             | 4.07E+06             | 6.61                        |
| 1.56                            | 11                           | 15 | 19 | 15.00   | 10000    | 100             | 1.50E+07             | 7.18                        |
| 0.78                            | 25                           | 31 | 24 | 26.67   | 10000    | 100             | 2.67E+07             | 7.43                        |
| 0.39                            | 17                           | 19 | 20 | 18.67   | 10000    | 100             | 1.87E+07             | 7.27                        |

|                                 | Number of colonies (assay 2) |    |    | Average | Dilution | Dilution factor | CFU mL <sup>-1</sup> | log (CFU mL <sup>-1</sup> ) |
|---------------------------------|------------------------------|----|----|---------|----------|-----------------|----------------------|-----------------------------|
| Sample 3 (mg mL <sup>-1</sup> ) | R1                           | R2 | R3 |         |          |                 |                      |                             |
| 25                              | 0                            | 0  | 0  | 0       | 1        | 100             | 0                    | 0                           |
| 12.5                            | 53                           | 40 | 38 | 43.67   | 10       | 100             | 4.37E+04             | 4.64                        |
| 6.25                            | 15                           | 10 | 10 | 11.67   | 100      | 100             | 1.17E+05             | 5.07                        |
| 3.13                            | 46                           | 45 | 45 | 45.33   | 1000     | 100             | 4.53E+06             | 6.66                        |
| 1.56                            | 5                            | 11 | 9  | 8.33    | 10000    | 100             | 8.33E+06             | 6.92                        |
| 0.78                            | 23                           | 24 | 21 | 22.67   | 10000    | 100             | 2.27E+07             | 7.36                        |
| 0.39                            | 30                           | 22 | 28 | 26.67   | 10000    | 100             | 2.67E+07             | 7.43                        |

|                                 | Number of colonies (assay 3) |    |    | Average | Dilution | Dilution factor | CFU mL <sup>-1</sup> | log (CFU mL <sup>-1</sup> ) |
|---------------------------------|------------------------------|----|----|---------|----------|-----------------|----------------------|-----------------------------|
| Sample 3 (mg mL <sup>-1</sup> ) | R1                           | R2 | R3 |         |          |                 |                      |                             |
| 25                              | 0                            | 0  | 0  | 0       | 1        | 100             | 0                    | 0                           |
| 12.5                            | 47                           | 47 | 46 | 46.67   | 10       | 100             | 4.67E+04             | 4.67                        |
| 6.25                            | 10                           | 9  | 12 | 10.33   | 100      | 100             | 1.03E+05             | 5.01                        |
| 3.13                            | 39                           | 35 | 36 | 36.67   | 1000     | 100             | 3.67E+06             | 6.56                        |
| 1.56                            | 5                            | 10 | 9  | 8.00    | 10000    | 100             | 8.00E+06             | 6.90                        |
| 0.78                            | 19                           | 15 | 10 | 14.67   | 10000    | 100             | 1.47E+07             | 7.17                        |
| 0.39                            | 33                           | 31 | 25 | 29.67   | 10000    | 100             | 2.97E+07             | 7.47                        |

|                                                        | Sample 1 |         |         | Sample 2 |         |         | Sample 3 |         |         | Average<br>(CFU mL <sup>-1</sup> ) | Standard derivation |
|--------------------------------------------------------|----------|---------|---------|----------|---------|---------|----------|---------|---------|------------------------------------|---------------------|
| <i>P. pinaster</i> Ait. extract (mg mL <sup>-1</sup> ) | Assay 1  | Assay 2 | Assay 3 | Assay 1  | Assay 2 | Assay 3 | Assay 1  | Assay 2 | Assay 3 |                                    |                     |
| 25                                                     | 0        | 0       | 0       | 0        | 0       | 0       | 0        | 0       | 0       | 0                                  | 0                   |
| 12.5                                                   | 0        | 1.52288 | 1.52288 | 0        | 0       | 0       | 4.44196  | 4.64015 | 4.66901 | 1.86632                            | 2.13165             |
| 6.25                                                   | 2.42597  | 3.57596 | 3.68723 | 3.93785  | 4.44716 | 4.49601 | 5.30821  | 5.06695 | 5.01424 | 4.21773                            | 0.91220             |
| 3.13                                                   | 4.02803  | 5.10266 | 5.30103 | 6.93785  | 6.75587 | 6.70186 | 6.60924  | 6.65642 | 6.56427 | 6.07303                            | 1.01233             |
| 1.56                                                   | 4.47712  | 5.95424 | 6.01424 | 7.28631  | 7.02803 | 7.20412 | 7.17609  | 6.92082 | 6.90309 | 6.55156                            | 0.92138             |
| 0.78                                                   | 5.36798  | 7.65960 | 7.30821 | 7.49601  | 7.50060 | 7.55630 | 7.42597  | 7.35539 | 7.16633 | 7.20404                            | 0.70360             |
| 0.39                                                   | 7.92082  | 8.49136 | 7.92082 | 7.92082  | 8.06695 | 8.41497 | 7.27107  | 7.42597 | 7.47227 | 7.87834                            | 0.42472             |

This table represents the mean of the three independent experiments in the three samples studied and their standard deviations.

(d) *Pinus pinea* L. extract

| Sample 1 (mg mL <sup>-1</sup> ) | Number of colonies (assay 1) |    |    | Average | Dilution | Dilution factor | CFU mL <sup>-1</sup> | log (CFU mL <sup>-1</sup> ) |
|---------------------------------|------------------------------|----|----|---------|----------|-----------------|----------------------|-----------------------------|
|                                 | R1                           | R2 | R3 |         |          |                 |                      |                             |
| 25                              | 0                            | 0  | 0  | 0       | 1        | 100             | 0                    | 0                           |
| 12.5                            | 8                            | 5  | 6  | 6.33    | 1        | 100             | 6.33E+02             | 2.80                        |
| 6.25                            | 10                           | 15 | 16 | 13.67   | 1        | 100             | 1.37E+03             | 3.14                        |
| 3.13                            | 18                           | 12 | 21 | 17.00   | 10       | 100             | 1.70E+04             | 4.23                        |
| 1.56                            | 27                           | 29 | 24 | 26.67   | 10       | 100             | 2.67E+04             | 4.43                        |
| 0.78                            | 3                            | 7  | 4  | 4.67    | 100000   | 100             | 4.67E+07             | 7.67                        |
| 0.39                            | 10                           | 15 | 17 | 14.00   | 100000   | 100             | 1.40E+08             | 8.15                        |

| Sample 1 (mg mL <sup>-1</sup> ) | Number of colonies (assay 2) |    |    | Average | Dilution | Dilution factor | CFU mL <sup>-1</sup> | log (CFU mL <sup>-1</sup> ) |
|---------------------------------|------------------------------|----|----|---------|----------|-----------------|----------------------|-----------------------------|
|                                 | R1                           | R2 | R3 |         |          |                 |                      |                             |
| 25                              | 0                            | 0  | 0  | 0       | 1        | 100             | 0                    | 0                           |
| 12.5                            | 15                           | 6  | 15 | 12.00   | 1        | 100             | 1.20E+03             | 3.08                        |
| 6.25                            | 16                           | 23 | 24 | 21.00   | 1        | 100             | 2.10E+03             | 3.32                        |
| 3.13                            | 37                           | 39 | 40 | 38.67   | 10       | 100             | 3.87E+04             | 4.59                        |
| 1.56                            | 33                           | 35 | 38 | 35.33   | 100      | 100             | 3.53E+05             | 5.55                        |
| 0.78                            | 2                            | 1  | 8  | 3.67    | 10000    | 100             | 3.67E+06             | 6.56                        |
| 0.39                            | 10                           | 11 | 16 | 12.33   | 100000   | 100             | 1.23E+08             | 8.09                        |

| Sample 1 (mg mL <sup>-1</sup> ) | Number of colonies (assay 3) |    |    | Average | Dilution | Dilution factor | CFU mL <sup>-1</sup> | log (CFU mL <sup>-1</sup> ) |
|---------------------------------|------------------------------|----|----|---------|----------|-----------------|----------------------|-----------------------------|
|                                 | R1                           | R2 | R3 |         |          |                 |                      |                             |
| 25                              | 0                            | 0  | 0  | 0       | 1        | 100             | 0                    | 0                           |
| 12.5                            | 4                            | 5  | 3  | 4.00    | 1        | 100             | 4.00E+02             | 2.60                        |
| 6.25                            | 7                            | 8  | 9  | 8.00    | 10       | 100             | 8.00E+03             | 3.90                        |
| 3.13                            | 39                           | 42 | 45 | 42.00   | 10       | 100             | 4.20E+04             | 4.62                        |
| 1.56                            | 43                           | 45 | 9  | 32.33   | 100      | 100             | 3.23E+05             | 5.51                        |
| 0.78                            | 17                           | 25 | 25 | 22.33   | 10000    | 100             | 2.23E+07             | 7.35                        |

|      |   |   |   |      |        |     |          |      |
|------|---|---|---|------|--------|-----|----------|------|
| 0.39 | 6 | 8 | 6 | 6.67 | 100000 | 100 | 6.67E+07 | 7.82 |
|------|---|---|---|------|--------|-----|----------|------|

| Sample 2 (mg mL <sup>-1</sup> ) | Number of colonies (assay 1) |    |    | Average | Dilution | Dilution factor | CFU mL <sup>-1</sup> | log (CFU mL <sup>-1</sup> ) |
|---------------------------------|------------------------------|----|----|---------|----------|-----------------|----------------------|-----------------------------|
|                                 | R1                           | R2 | R3 |         |          |                 |                      |                             |
| 25                              | 0                            | 0  | 0  | 0       | 1        | 100             | 0                    | 0                           |
| 12.5                            | 0                            | 0  | 0  | 0       | 1        | 100             | 0                    | 0                           |
| 6.25                            | 6                            | 7  | 11 | 8.00    | 1        | 100             | 8.00E+02             | 2.90                        |
| 3.13                            | 45                           | 36 | 35 | 38.67   | 100      | 100             | 3.87E+05             | 5.59                        |
| 1.56                            | 17                           | 18 | 21 | 18.67   | 10000    | 100             | 1.87E+07             | 7.27                        |
| 0.78                            | 39                           | 37 | 37 | 37.67   | 10000    | 100             | 3.77E+07             | 7.58                        |
| 0.39                            | 9                            | 11 | 16 | 12.00   | 100000   | 100             | 1.20E+08             | 8.08                        |

| Sample 2 (mg mL <sup>-1</sup> ) | Number of colonies (assay 2) |    |    | Average | Dilution | Dilution factor | CFU mL <sup>-1</sup> | log (CFU mL <sup>-1</sup> ) |
|---------------------------------|------------------------------|----|----|---------|----------|-----------------|----------------------|-----------------------------|
|                                 | R1                           | R2 | R3 |         |          |                 |                      |                             |
| 25                              | 0                            | 0  | 0  | 0       | 1        | 100             | 0                    | 0                           |
| 12.5                            | 0                            | 0  | 0  | 0       | 1        | 100             | 0                    | 0                           |
| 6.25                            | 6                            | 3  | 5  | 4.67    | 1        | 100             | 4.67E+02             | 2.67                        |
| 3.13                            | 35                           | 27 | 25 | 29.00   | 100      | 100             | 2.90E+05             | 5.46                        |
| 1.56                            | 15                           | 19 | 17 | 17.00   | 10000    | 100             | 1.70E+07             | 7.23                        |
| 0.78                            | 38                           | 36 | 26 | 33.33   | 10000    | 100             | 3.33E+07             | 7.52                        |
| 0.39                            | 9                            | 10 | 8  | 9.00    | 100000   | 100             | 9.00E+07             | 7.95                        |

| Sample 2 (mg mL <sup>-1</sup> ) | Number of colonies (assay 3) |    |    | Average | Dilution | Dilution factor | CFU mL <sup>-1</sup> | log (CFU mL <sup>-1</sup> ) |
|---------------------------------|------------------------------|----|----|---------|----------|-----------------|----------------------|-----------------------------|
|                                 | R1                           | R2 | R3 |         |          |                 |                      |                             |
| 25                              | 0                            | 0  | 0  | 0       | 1        | 100             | 0                    | 0                           |
| 12.5                            | 0                            | 0  | 0  | 0       | 1        | 100             | 0                    | 0                           |
| 6.25                            | 17                           | 20 | 15 | 17.33   | 1        | 100             | 1.73E+03             | 3.24                        |
| 3.13                            | 36                           | 39 | 29 | 34.67   | 100      | 100             | 3.47E+05             | 5.54                        |
| 1.56                            | 29                           | 30 | 24 | 27.67   | 10000    | 100             | 2.77E+07             | 7.44                        |
| 0.78                            | 49                           | 57 | 46 | 50.67   | 10000    | 100             | 5.07E+07             | 7.70                        |
| 0.39                            | 25                           | 26 | 23 | 24.67   | 100000   | 100             | 2.47E+08             | 8.39                        |



|                                 | Number of colonies (assay 1) |    |    | Average | Dilution | Dilution factor | CFU mL <sup>-1</sup> | log (CFU mL <sup>-1</sup> ) |
|---------------------------------|------------------------------|----|----|---------|----------|-----------------|----------------------|-----------------------------|
| Sample 3 (mg mL <sup>-1</sup> ) | R1                           | R2 | R3 |         |          |                 |                      |                             |
| 25                              | 0                            | 0  | 0  | 0       | 1        | 100             | 0                    | 0                           |
| 12.5                            | 3                            | 7  | 2  | 4.00    | 10       | 100             | 4.00E+03             | 3.60                        |
| 6.25                            | 17                           | 11 | 16 | 14.67   | 10       | 100             | 1.47E+04             | 4.17                        |
| 3.13                            | 20                           | 27 | 26 | 24.33   | 100      | 100             | 2.43E+05             | 5.39                        |
| 1.56                            | 45                           | 37 | 33 | 38.33   | 10000    | 100             | 3.83E+07             | 7.58                        |
| 0.78                            | 11                           | 2  | 9  | 7.33    | 10000    | 100             | 7.33E+06             | 6.87                        |
| 0.39                            | 9                            | 5  | 7  | 7.00    | 100000   | 100             | 7.00E+07             | 7.85                        |

|                                 | Number of colonies (assay 2) |    |    | Average | Dilution | Dilution factor | CFU mL <sup>-1</sup> | log (CFU mL <sup>-1</sup> ) |
|---------------------------------|------------------------------|----|----|---------|----------|-----------------|----------------------|-----------------------------|
| Sample 3 (mg mL <sup>-1</sup> ) | R1                           | R2 | R3 |         |          |                 |                      |                             |
| 25                              | 0                            | 0  | 0  | 0       | 1        | 100             | 0                    | 0                           |
| 12.5                            | 5                            | 17 | 4  | 8.67    | 10       | 100             | 8.67E+03             | 3.94                        |
| 6.25                            | 57                           | 58 | 41 | 52.00   | 10       | 100             | 5.20E+04             | 4.72                        |
| 3.13                            | 16                           | 14 | 12 | 14.00   | 100      | 100             | 1.40E+05             | 5.15                        |
| 1.56                            | 5                            | 10 | 10 | 8.33    | 10000    | 100             | 8.33E+06             | 6.92                        |
| 0.78                            | 25                           | 24 | 23 | 24.00   | 10000    | 100             | 2.40E+07             | 7.38                        |
| 0.39                            | 30                           | 19 | 28 | 25.67   | 10000    | 100             | 2.57E+07             | 7.41                        |

|                                 | Number of colonies (assay 3) |    |    | Average | Dilution | Dilution factor | CFU mL <sup>-1</sup> | log (CFU mL <sup>-1</sup> ) |
|---------------------------------|------------------------------|----|----|---------|----------|-----------------|----------------------|-----------------------------|
| Sample 3 (mg mL <sup>-1</sup> ) | R1                           | R2 | R3 |         |          |                 |                      |                             |
| 25                              | 0                            | 0  | 0  | 0       | 1        | 100             | 0                    | 0                           |
| 12.5                            | 39                           | 29 | 43 | 37.00   | 10       | 100             | 3.70E+04             | 4.57                        |
| 6.25                            | 56                           | 61 | 59 | 58.67   | 10       | 100             | 5.87E+04             | 4.77                        |
| 3.13                            | 21                           | 24 | 27 | 24.00   | 100      | 100             | 2.40E+05             | 5.38                        |
| 1.56                            | 13                           | 13 | 6  | 10.67   | 10000    | 100             | 1.07E+07             | 7.03                        |
| 0.78                            | 19                           | 18 | 20 | 19.00   | 10000    | 100             | 1.90E+07             | 7.28                        |
| 0.39                            | 13                           | 24 | 23 | 20.00   | 10000    | 100             | 2.00E+07             | 7.30                        |

|                                                   | Sample 1 |         |         | Sample 2 |         |         | Sample 3 |         |         | Average<br>(CFU mL <sup>-1</sup> ) | Standard derivation |
|---------------------------------------------------|----------|---------|---------|----------|---------|---------|----------|---------|---------|------------------------------------|---------------------|
| <i>P. pinea</i> L. extract (mg mL <sup>-1</sup> ) | Assay 1  | Assay 2 | Assay 3 | Assay 1  | Assay 2 | Assay 3 | Assay 1  | Assay 2 | Assay 3 |                                    |                     |
| 25                                                | 0        | 0       | 0       | 0        | 0       | 0       | 0        | 0       | 0       | 0                                  | 0                   |
| 12.5                                              | 2.80163  | 3.07918 | 2.60206 | 0        | 0       | 0       | 3.60206  | 3.93785 | 4.56820 | 2.28789                            | 1.81457             |
| 6.25                                              | 3.13566  | 3.32222 | 3.90309 | 2.90309  | 2.66901 | 3.23888 | 4.16633  | 4.71600 | 4.76839 | 3.64696                            | 0.77290             |
| 3.13                                              | 4.23045  | 4.58734 | 4.62325 | 5.58734  | 5.46240 | 5.53991 | 5.38620  | 5.14613 | 5.38021 | 5.10480                            | 0.49635             |
| 1.56                                              | 4.42597  | 5.54818 | 5.50965 | 7.27107  | 7.23045 | 7.44196 | 7.58358  | 6.92082 | 7.02803 | 6.55108                            | 1.10738             |
| 0.78                                              | 7.66901  | 6.56427 | 7.34895 | 7.57596  | 7.52288 | 7.70472 | 6.86530  | 7.38021 | 7.27875 | 7.32334                            | 0.38086             |
| 0.39                                              | 8.14613  | 8.09108 | 7.82391 | 8.07918  | 7.95424 | 8.39211 | 7.84510  | 7.40937 | 7.30103 | 7.89357                            | 0.35040             |

This table represents the mean of the three independent experiments in the three samples studied and their standard deviations.

**Table S2.** *E. coli* counts after application of *Pinus pinaster* Ait. and *Pinus pinea* L. bark polar extracts. (a) *E. coli* control: The bacterial control was only inoculated with *E. coli*; (b) Solvent control: The solvent control represents the bacterial growth under 12.5% (v/v) ethanol; (c) *Pinus pinaster* Ait. extract: The results represent the effect of *P. pinaster* Ait. bark polar extract against the growth of *E. coli* and (d) *Pinus pinea* L. extract: The results represent the effect of *P. pinea* L. bark polar extract against the growth of *E. coli*. *Pinus* spp. bark polar extracts were prepared in triplicate (samples 1-3). Each sample was evaluated three times (assay 1- 2) in different periods to secure independent replication. with three replicates (R1-R3) for each concentration. The results represent the mean of the three independent experiments in the three samples studied and their standard deviations.

**(a) *E. coli* control**

|                        | Number of colonies |    |    |          |    |    |          |    |    | Average | Dilution | Dilution factor | CFU mL <sup>-1</sup> | log (CFU mL <sup>-1</sup> ) | Average log (CFU mL <sup>-1</sup> ) | Standard derivation |
|------------------------|--------------------|----|----|----------|----|----|----------|----|----|---------|----------|-----------------|----------------------|-----------------------------|-------------------------------------|---------------------|
|                        | Sample 1           |    |    | Sample 2 |    |    | Sample 3 |    |    |         |          |                 |                      |                             |                                     |                     |
| <i>E. coli</i> control | R1                 | R2 | R3 | R1       | R2 | R3 | R1       | R2 | R3 |         |          |                 |                      |                             |                                     |                     |
| Assay 1                | 4                  | 5  | 7  | 60       | 52 | 55 | 35       | 50 | 44 | 34.67   | 100000   | 100             | 3.47E+08             | 8.54                        | 8.54314                             | 0.00288             |
| Assay 2                | 39                 | 41 | 35 | 16       | 13 | 15 | 54       | 48 | 54 | 35.00   | 100000   | 100             | 3.50E+08             | 8.54                        |                                     |                     |
| Assay 3                | 37                 | 42 | 39 | 23       | 25 | 27 | 42       | 39 | 42 | 35.11   | 100000   | 100             | 3.51E+08             | 8.55                        |                                     |                     |

**(b) Solvent control**

|                      | Number of colonies |    |    |          |    |    |          |    |    | Average | Dilution | Dilution factor | CFU mL <sup>-1</sup> | log (CFU mL <sup>-1</sup> ) | Average log (CFU mL <sup>-1</sup> ) | Standard derivation |
|----------------------|--------------------|----|----|----------|----|----|----------|----|----|---------|----------|-----------------|----------------------|-----------------------------|-------------------------------------|---------------------|
|                      | Sample 1           |    |    | Sample 2 |    |    | Sample 3 |    |    |         |          |                 |                      |                             |                                     |                     |
| Solvent 12.5 % (v/v) | R1                 | R2 | R3 | R1       | R2 | R3 | R1       | R2 | R3 |         |          |                 |                      |                             |                                     |                     |
| Assay 1              | 4                  | 1  | 2  | 37       | 40 | 42 | 38       | 37 | 41 | 26.89   | 100000   | 100             | 2.69E+08             | 8.42957                     | 8.37132                             | 0.06083             |
| Assay 2              | 26                 | 21 | 25 | 5        | 9  | 12 | 37       | 39 | 40 | 23.78   | 100000   | 100             | 2.38E+08             | 8.37617                     |                                     |                     |
| Assay 3              | 6                  | 8  | 6  | 19       | 21 | 20 | 36       | 35 | 32 | 20.33   | 100000   | 100             | 2.03E+08             | 8.30821                     |                                     |                     |

(c) *Pinus pinaster* Ait. extract

| Sample 1 (mg mL <sup>-1</sup> ) | Number of colonies (assay 1) |    |    | Average | Dilution | Dilution factor | CFU mL <sup>-1</sup> | log (CFU mL <sup>-1</sup> ) |
|---------------------------------|------------------------------|----|----|---------|----------|-----------------|----------------------|-----------------------------|
|                                 | R1                           | R2 | R3 |         |          |                 |                      |                             |
| 25                              | 0                            | 0  | 0  | 0       | 1        | 100             | 0                    | 0                           |
| 12.5                            | 9                            | 9  | 5  | 7.67    | 100000   | 100             | 7.67E+07             | 7.88                        |
| 6.25                            | 31                           | 29 | 33 | 31.00   | 100000   | 100             | 3.10E+08             | 8.49                        |
| 3.13                            | 32                           | 34 | 36 | 34.00   | 100000   | 100             | 3.40E+08             | 8.53                        |
| 1.56                            | 32                           | 27 | 31 | 30.00   | 100000   | 100             | 3.00E+08             | 8.48                        |
| 0.78                            | 31                           | 34 | 37 | 34.00   | 100000   | 100             | 3.40E+08             | 8.53                        |
| 0.39                            | 39                           | 31 | 35 | 35.00   | 100000   | 100             | 3.50E+08             | 8.54                        |

| Sample 1 (mg mL <sup>-1</sup> ) | Number of colonies (assay 2) |    |    | Average | Dilution | Dilution factor | CFU mL <sup>-1</sup> | log (CFU mL <sup>-1</sup> ) |
|---------------------------------|------------------------------|----|----|---------|----------|-----------------|----------------------|-----------------------------|
|                                 | R1                           | R2 | R3 |         |          |                 |                      |                             |
| 25                              | 0                            | 0  | 0  | 0       | 1        | 100             | 0                    | 0                           |
| 12.5                            | 16                           | 16 | 9  | 13.67   | 100000   | 100             | 1.37E+08             | 8.14                        |
| 6.25                            | 34                           | 37 | 41 | 37.33   | 100000   | 100             | 3.73E+08             | 8.57                        |
| 3.13                            | 35                           | 43 | 31 | 36.33   | 100000   | 100             | 3.63E+08             | 8.56                        |
| 1.56                            | 33                           | 38 | 42 | 37.67   | 100000   | 100             | 3.77E+08             | 8.58                        |
| 0.78                            | 44                           | 37 | 34 | 38.33   | 100000   | 100             | 3.83E+08             | 8.58                        |
| 0.39                            | 38                           | 31 | 45 | 38.00   | 100000   | 100             | 3.80E+08             | 8.58                        |

| Sample 1 (mg mL <sup>-1</sup> ) | Number of colonies (assay 3) |    |    | Average | Dilution | Dilution factor | CFU mL <sup>-1</sup> | log (CFU mL <sup>-1</sup> ) |
|---------------------------------|------------------------------|----|----|---------|----------|-----------------|----------------------|-----------------------------|
|                                 | R1                           | R2 | R3 |         |          |                 |                      |                             |
| 25                              | 0                            | 0  | 0  | 0       | 1        | 100             | 0                    | 0.00                        |
| 12.5                            | 10                           | 12 | 12 | 11.33   | 100000   | 100             | 1.13E+08             | 8.05                        |
| 6.25                            | 33                           | 27 | 32 | 30.67   | 100000   | 100             | 3.07E+08             | 8.49                        |
| 3.13                            | 45                           | 38 | 41 | 41.33   | 100000   | 100             | 4.13E+08             | 8.62                        |
| 1.56                            | 43                           | 37 | 41 | 40.33   | 100000   | 100             | 4.03E+08             | 8.61                        |
| 0.78                            | 38                           | 41 | 39 | 39.33   | 100000   | 100             | 3.93E+08             | 8.59                        |
| 0.39                            | 42                           | 41 | 45 | 42.67   | 100000   | 100             | 4.27E+08             | 8.63                        |

|                                 | Number of colonies (assay 1) |    |    | Average | Dilution | Dilution factor | CFU mL <sup>-1</sup> | log (CFU mL <sup>-1</sup> ) |
|---------------------------------|------------------------------|----|----|---------|----------|-----------------|----------------------|-----------------------------|
| Sample 2 (mg mL <sup>-1</sup> ) | R1                           | R2 | R3 |         |          |                 |                      |                             |
| 25                              | 0                            | 0  | 0  | 0       | 1        | 100             | 0                    | 0                           |
| 12.5                            | 31                           | 33 | 35 | 33.00   | 100000   | 100             | 3.30E+08             | 8.52                        |
| 6.25                            | 51                           | 49 | 50 | 50.00   | 100000   | 100             | 5.00E+08             | 8.70                        |
| 3.13                            | 51                           | 53 | 49 | 51.00   | 100000   | 100             | 5.10E+08             | 8.71                        |
| 1.56                            | 51                           | 57 | 55 | 54.33   | 100000   | 100             | 5.43E+08             | 8.74                        |
| 0.78                            | 53                           | 57 | 51 | 53.67   | 100000   | 100             | 5.37E+08             | 8.73                        |
| 0.39                            | 55                           | 52 | 54 | 53.67   | 100000   | 100             | 5.37E+08             | 8.73                        |

|                                 | Number of colonies (assay 2) |    |    | Average | Dilution | Dilution factor | CFU mL <sup>-1</sup> | log (CFU mL <sup>-1</sup> ) |
|---------------------------------|------------------------------|----|----|---------|----------|-----------------|----------------------|-----------------------------|
| Sample 2 (mg mL <sup>-1</sup> ) | R1                           | R2 | R3 |         |          |                 |                      |                             |
| 25                              | 0                            | 0  | 0  | 0       | 1        | 100             | 0                    | 0                           |
| 12.5                            | 10                           | 9  | 8  | 9.00    | 100000   | 100             | 9.00E+07             | 7.95                        |
| 6.25                            | 49                           | 51 | 52 | 50.67   | 100000   | 100             | 5.07E+08             | 8.70                        |
| 3.13                            | 53                           | 54 | 50 | 52.33   | 100000   | 100             | 5.23E+08             | 8.72                        |
| 1.56                            | 48                           | 55 | 50 | 51.00   | 100000   | 100             | 5.10E+08             | 8.71                        |
| 0.78                            | 51                           | 53 | 50 | 51.33   | 100000   | 100             | 5.13E+08             | 8.71                        |
| 0.39                            | 54                           | 47 | 56 | 52.33   | 100000   | 100             | 5.23E+08             | 8.72                        |

|                                 | Number of colonies (assay 3) |    |    | Average | Dilution | Dilution factor | CFU mL <sup>-1</sup> | log (CFU mL <sup>-1</sup> ) |
|---------------------------------|------------------------------|----|----|---------|----------|-----------------|----------------------|-----------------------------|
| Sample 2 (mg mL <sup>-1</sup> ) | R1                           | R2 | R3 |         |          |                 |                      |                             |
| 25                              | 0                            | 0  | 0  | 0       | 1        | 100             | 0                    | 0                           |
| 12.5                            | 19                           | 12 | 15 | 15.33   | 100000   | 100             | 1.53E+08             | 8.19                        |
| 6.25                            | 34                           | 38 | 32 | 34.67   | 100000   | 100             | 3.47E+08             | 8.54                        |
| 3.13                            | 33                           | 34 | 40 | 35.67   | 100000   | 100             | 3.57E+08             | 8.55                        |
| 1.56                            | 35                           | 38 | 37 | 36.67   | 100000   | 100             | 3.67E+08             | 8.56                        |
| 0.78                            | 41                           | 35 | 37 | 37.67   | 100000   | 100             | 3.77E+08             | 8.58                        |
| 0.39                            | 34                           | 37 | 36 | 35.67   | 100000   | 100             | 3.57E+08             | 8.55                        |

| Sample 3 (mg mL <sup>-1</sup> ) | Number of colonies (assay 1) |    |    | Average | Dilution | Dilution factor | CFU mL <sup>-1</sup> | log (CFU mL <sup>-1</sup> ) |
|---------------------------------|------------------------------|----|----|---------|----------|-----------------|----------------------|-----------------------------|
|                                 | R1                           | R2 | R3 |         |          |                 |                      |                             |
| 25                              | 0                            | 0  | 0  | 0       | 1        | 100             | 0                    | 0.00                        |
| 12.5                            | 31                           | 34 | 39 | 34.67   | 100000   | 100             | 3.47E+08             | 8.54                        |
| 6.25                            | 51                           | 45 | 54 | 50.00   | 100000   | 100             | 5.00E+08             | 8.70                        |
| 3.13                            | 52                           | 56 | 50 | 52.67   | 100000   | 100             | 5.27E+08             | 8.72                        |
| 1.56                            | 49                           | 51 | 57 | 52.33   | 100000   | 100             | 5.23E+08             | 8.72                        |
| 0.78                            | 53                           | 54 | 51 | 52.67   | 100000   | 100             | 5.27E+08             | 8.72                        |
| 0.39                            | 52                           | 51 | 53 | 52.00   | 100000   | 100             | 5.20E+08             | 8.72                        |

| Sample 3 (mg mL <sup>-1</sup> ) | Number of colonies (assay 2) |    |    | Average | Dilution | Dilution factor | CFU mL <sup>-1</sup> | log (CFU mL <sup>-1</sup> ) |
|---------------------------------|------------------------------|----|----|---------|----------|-----------------|----------------------|-----------------------------|
|                                 | R1                           | R2 | R3 |         |          |                 |                      |                             |
| 25                              | 0                            | 0  | 0  | 0       | 1        | 100             | 0                    | 0                           |
| 12.5                            | 12                           | 15 | 12 | 13.00   | 100000   | 100             | 1.30E+08             | 8.11                        |
| 6.25                            | 19                           | 22 | 20 | 20.33   | 100000   | 100             | 2.03E+08             | 8.31                        |
| 3.13                            | 24                           | 22 | 20 | 22.00   | 100000   | 100             | 2.20E+08             | 8.34                        |
| 1.56                            | 18                           | 23 | 25 | 22.00   | 100000   | 100             | 2.20E+08             | 8.34                        |
| 0.78                            | 24                           | 21 | 23 | 22.67   | 100000   | 100             | 2.27E+08             | 8.36                        |
| 0.39                            | 17                           | 23 | 26 | 22.00   | 100000   | 100             | 2.20E+08             | 8.34                        |

| Sample 3 (mg mL <sup>-1</sup> ) | Number of colonies (assay 3) |    |    | Average | Dilution | Dilution factor | CFU mL <sup>-1</sup> | log (CFU mL <sup>-1</sup> ) |
|---------------------------------|------------------------------|----|----|---------|----------|-----------------|----------------------|-----------------------------|
|                                 | R1                           | R2 | R3 |         |          |                 |                      |                             |
| 25                              | 0                            | 0  | 0  | 0       | 1        | 100             | 0                    | 0                           |
| 12.5                            | 21                           | 25 | 26 | 24.00   | 100000   | 100             | 2.40E+08             | 8.38                        |
| 6.25                            | 19                           | 22 | 24 | 21.67   | 100000   | 100             | 2.17E+08             | 8.34                        |
| 3.13                            | 25                           | 21 | 23 | 23.00   | 100000   | 100             | 2.30E+08             | 8.36                        |
| 1.56                            | 25                           | 19 | 23 | 22.33   | 100000   | 100             | 2.23E+08             | 8.35                        |
| 0.78                            | 22                           | 26 | 21 | 23.00   | 100000   | 100             | 2.30E+08             | 8.36                        |
| 0.39                            | 20                           | 24 | 23 | 22.33   | 100000   | 100             | 2.23E+08             | 8.35                        |

|                                                        | Sample 1 |         |         | Sample 2 |         |         | Sample 3 |         |         | Average<br>(CFU mL <sup>-1</sup> ) | Standard derivation |
|--------------------------------------------------------|----------|---------|---------|----------|---------|---------|----------|---------|---------|------------------------------------|---------------------|
| <i>P. pinaster</i> Ait. extract (mg mL <sup>-1</sup> ) | Assay 1  | Assay 2 | Assay 3 | Assay 1  | Assay 2 | Assay 3 | Assay 1  | Assay 2 | Assay 3 |                                    |                     |
| 25                                                     | 0        | 0       | 0       | 0        | 0       | 0       | 0        | 0       | 0       | 0                                  | 0                   |
| 12.5                                                   | 7.88461  | 8.13566 | 8.05436 | 8.51851  | 7.95424 | 8.18564 | 8.53991  | 8.11394 | 8.38021 | 8.19634                            | 0.23510             |
| 6.25                                                   | 8.49136  | 8.57210 | 8.48667 | 8.69897  | 8.70472 | 8.53991 | 8.69897  | 8.30821 | 8.33579 | 8.53741                            | 0.14970             |
| 3.13                                                   | 8.53148  | 8.56031 | 8.61630 | 8.70757  | 8.71878 | 8.55226 | 8.72154  | 8.34242 | 8.36173 | 8.56804                            | 0.14283             |
| 1.56                                                   | 8.47712  | 8.57596 | 8.60566 | 8.73507  | 8.70757 | 8.56427 | 8.71878  | 8.34242 | 8.34895 | 8.56398                            | 0.14942             |
| 0.78                                                   | 8.53148  | 8.58358 | 8.59476 | 8.72970  | 8.71040 | 8.57596 | 8.72154  | 8.35539 | 8.36173 | 8.57384                            | 0.14133             |
| 0.39                                                   | 8.54407  | 8.57978 | 8.63009 | 8.72970  | 8.71878 | 8.55226 | 8.71600  | 8.34242 | 8.34895 | 8.57356                            | 0.14756             |

This table represents the mean of the three independent experiments in the three samples studied and their standard deviations.

(d) *Pinus pinea* L. extract

| Sample 1 (mg mL <sup>-1</sup> ) | Number of colonies (assay 1) |    |    | Average | Dilution | Dilution factor | CFU mL <sup>-1</sup> | log (CFU mL <sup>-1</sup> ) |
|---------------------------------|------------------------------|----|----|---------|----------|-----------------|----------------------|-----------------------------|
|                                 | R1                           | R2 | R3 |         |          |                 |                      |                             |
| 25                              | 0                            | 0  | 0  | 0       | 1        | 100             | 0                    | 0                           |
| 12.5                            | 9                            | 9  | 8  | 8.67    | 100000   | 100             | 8.67E+07             | 7.94                        |
| 6.25                            | 30                           | 35 | 36 | 33.67   | 100000   | 100             | 3.37E+08             | 8.53                        |
| 3.13                            | 38                           | 32 | 31 | 33.67   | 100000   | 100             | 3.37E+08             | 8.53                        |
| 1.56                            | 37                           | 29 | 34 | 33.33   | 100000   | 100             | 3.33E+08             | 8.52                        |
| 0.78                            | 33                           | 37 | 34 | 34.67   | 100000   | 100             | 3.47E+08             | 8.54                        |
| 0.39                            | 30                           | 35 | 37 | 34.00   | 100000   | 100             | 3.40E+08             | 8.53                        |

| Sample 1 (mg mL <sup>-1</sup> ) | Number of colonies (assay 2) |    |    | Average | Dilution | Dilution factor | CFU mL <sup>-1</sup> | log (CFU mL <sup>-1</sup> ) |
|---------------------------------|------------------------------|----|----|---------|----------|-----------------|----------------------|-----------------------------|
|                                 | R1                           | R2 | R3 |         |          |                 |                      |                             |
| 25                              | 0                            | 0  | 0  | 0       | 1        | 100             | 0                    | 0                           |
| 12.5                            | 3                            | 5  | 9  | 5.67    | 100000   | 100             | 5.67E+07             | 7.75                        |
| 6.25                            | 22                           | 28 | 26 | 25.33   | 100000   | 100             | 2.53E+08             | 8.40                        |
| 3.13                            | 37                           | 41 | 46 | 41.33   | 100000   | 100             | 4.13E+08             | 8.62                        |
| 1.56                            | 40                           | 43 | 49 | 44.00   | 100000   | 100             | 4.40E+08             | 8.64                        |
| 0.78                            | 42                           | 45 | 48 | 45.00   | 100000   | 100             | 4.50E+08             | 8.65                        |
| 0.39                            | 38                           | 42 | 44 | 41.33   | 100000   | 100             | 4.13E+08             | 8.62                        |

| Sample 1 (mg mL <sup>-1</sup> ) | Number of colonies (assay 3) |    |    | Average | Dilution | Dilution factor | CFU mL <sup>-1</sup> | log (CFU mL <sup>-1</sup> ) |
|---------------------------------|------------------------------|----|----|---------|----------|-----------------|----------------------|-----------------------------|
|                                 | R1                           | R2 | R3 |         |          |                 |                      |                             |
| 25                              | 0                            | 0  | 0  | 0       | 1        | 100             | 0                    | 0                           |
| 12.5                            | 7                            | 2  | 3  | 4.00    | 100000   | 100             | 4.00E+07             | 7.60                        |
| 6.25                            | 31                           | 35 | 34 | 33.33   | 100000   | 100             | 3.33E+08             | 8.52                        |
| 3.13                            | 41                           | 44 | 37 | 40.67   | 100000   | 100             | 4.07E+08             | 8.61                        |
| 1.56                            | 42                           | 39 | 42 | 41.00   | 100000   | 100             | 4.10E+08             | 8.61                        |
| 0.78                            | 40                           | 44 | 37 | 40.33   | 100000   | 100             | 4.03E+08             | 8.61                        |
| 0.39                            | 39                           | 41 | 43 | 41.00   | 100000   | 100             | 4.10E+08             | 8.61                        |



|                                 | Number of colonies (assay 1) |    |    | Average | Dilution | Dilution factor | CFU mL <sup>-1</sup> | log (CFU mL <sup>-1</sup> ) |
|---------------------------------|------------------------------|----|----|---------|----------|-----------------|----------------------|-----------------------------|
| Sample 2 (mg mL <sup>-1</sup> ) | R1                           | R2 | R3 |         |          |                 |                      |                             |
| 25                              | 0                            | 0  | 0  | 0       | 1        | 100             | 0                    | 0                           |
| 12.5                            | 17                           | 21 | 19 | 19.00   | 100000   | 100             | 1.90E+08             | 8.28                        |
| 6.25                            | 44                           | 45 | 49 | 46.00   | 100000   | 100             | 4.60E+08             | 8.66                        |
| 3.13                            | 42                           | 42 | 41 | 41.67   | 100000   | 100             | 4.17E+08             | 8.62                        |
| 1.56                            | 43                           | 38 | 41 | 40.67   | 100000   | 100             | 4.07E+08             | 8.61                        |
| 0.78                            | 51                           | 50 | 44 | 48.33   | 100000   | 100             | 4.83E+08             | 8.68                        |
| 0.39                            | 53                           | 51 | 50 | 51.33   | 100000   | 100             | 5.13E+08             | 8.71                        |

|                                 | Number of colonies (assay 2) |    |    | Average | Dilution | Dilution factor | CFU mL <sup>-1</sup> | log (CFU mL <sup>-1</sup> ) |
|---------------------------------|------------------------------|----|----|---------|----------|-----------------|----------------------|-----------------------------|
| Sample 2 (mg mL <sup>-1</sup> ) | R1                           | R2 | R3 |         |          |                 |                      |                             |
| 25                              | 0                            | 0  | 0  | 0       | 1        | 100             | 0                    | 0                           |
| 12.5                            | 31                           | 32 | 32 | 31.67   | 100000   | 100             | 3.17E+08             | 8.50                        |
| 6.25                            | 49                           | 51 | 53 | 51.00   | 100000   | 100             | 5.10E+08             | 8.71                        |
| 3.13                            | 52                           | 54 | 50 | 52.00   | 100000   | 100             | 5.20E+08             | 8.72                        |
| 1.56                            | 49                           | 53 | 51 | 51.00   | 100000   | 100             | 5.10E+08             | 8.71                        |
| 0.78                            | 55                           | 48 | 52 | 51.67   | 100000   | 100             | 5.17E+08             | 8.71                        |
| 0.39                            | 53                           | 51 | 49 | 51.00   | 100000   | 100             | 5.10E+08             | 8.71                        |

|                                 | Number of colonies (assay 3) |    |    | Average | Dilution | Dilution factor | CFU mL <sup>-1</sup> | log (CFU mL <sup>-1</sup> ) |
|---------------------------------|------------------------------|----|----|---------|----------|-----------------|----------------------|-----------------------------|
| Sample 2 (mg mL <sup>-1</sup> ) | R1                           | R2 | R3 |         |          |                 |                      |                             |
| 25                              | 0                            | 0  | 0  | 0       | 1        | 100             | 0                    | 0                           |
| 12.5                            | 21                           | 19 | 22 | 20.67   | 100000   | 100             | 2.07E+08             | 8.32                        |
| 6.25                            | 41                           | 38 | 36 | 38.33   | 100000   | 100             | 3.83E+08             | 8.58                        |
| 3.13                            | 37                           | 34 | 40 | 37.00   | 100000   | 100             | 3.70E+08             | 8.57                        |
| 1.56                            | 39                           | 35 | 37 | 37.00   | 100000   | 100             | 3.70E+08             | 8.57                        |
| 0.78                            | 35                           | 38 | 34 | 35.67   | 100000   | 100             | 3.57E+08             | 8.55                        |
| 0.39                            | 37                           | 41 | 39 | 39.00   | 100000   | 100             | 3.90E+08             | 8.59                        |

|                                 | Number of colonies (assay 1) |    |    | Average | Dilution | Dilution factor | CFU mL <sup>-1</sup> | log (CFU mL <sup>-1</sup> ) |
|---------------------------------|------------------------------|----|----|---------|----------|-----------------|----------------------|-----------------------------|
| Sample 3 (mg mL <sup>-1</sup> ) | R1                           | R2 | R3 |         |          |                 |                      |                             |
| 25                              | 0                            | 0  | 0  | 0       | 1        | 100             | 0                    | 0                           |
| 12.5                            | 24                           | 28 | 28 | 26.67   | 100000   | 100             | 2.67E+08             | 8.43                        |
| 6.25                            | 45                           | 40 | 39 | 41.33   | 100000   | 100             | 4.13E+08             | 8.62                        |
| 3.13                            | 58                           | 59 | 53 | 56.67   | 100000   | 100             | 5.67E+08             | 8.75                        |
| 1.56                            | 57                           | 56 | 61 | 58.00   | 100000   | 100             | 5.80E+08             | 8.76                        |
| 0.78                            | 45                           | 50 | 52 | 49.00   | 100000   | 100             | 4.90E+08             | 8.69                        |
| 0.39                            | 47                           | 53 | 50 | 50.00   | 100000   | 100             | 5.00E+08             | 8.70                        |

|                                 | Number of colonies (assay 2) |    |    | Average | Dilution | Dilution factor | CFU mL <sup>-1</sup> | log (CFU mL <sup>-1</sup> ) |
|---------------------------------|------------------------------|----|----|---------|----------|-----------------|----------------------|-----------------------------|
| Sample 3 (mg mL <sup>-1</sup> ) | R1                           | R2 | R3 |         |          |                 |                      |                             |
| 25                              | 0                            | 0  | 0  | 0       | 1        | 100             | 0                    | 0                           |
| 12.5                            | 12                           | 18 | 19 | 16.33   | 100000   | 100             | 1.63E+08             | 8.21                        |
| 6.25                            | 17                           | 22 | 24 | 21.00   | 100000   | 100             | 2.10E+08             | 8.32                        |
| 3.13                            | 22                           | 20 | 23 | 21.67   | 100000   | 100             | 2.17E+08             | 8.34                        |
| 1.56                            | 23                           | 25 | 21 | 23.00   | 100000   | 100             | 2.30E+08             | 8.36                        |
| 0.78                            | 20                           | 24 | 22 | 22.00   | 100000   | 100             | 2.20E+08             | 8.34                        |
| 0.39                            | 23                           | 25 | 20 | 22.67   | 100000   | 100             | 2.27E+08             | 8.36                        |

|                                 | Number of colonies (assay 3) |    |    | Average | Dilution | Dilution factor | CFU mL <sup>-1</sup> | log (CFU mL <sup>-1</sup> ) |
|---------------------------------|------------------------------|----|----|---------|----------|-----------------|----------------------|-----------------------------|
| Sample 3 (mg mL <sup>-1</sup> ) | R1                           | R2 | R3 |         |          |                 |                      |                             |
| 25                              | 0                            | 0  | 0  | 0       | 1        | 100             | 0                    | 0                           |
| 12.5                            | 21                           | 25 | 23 | 23.00   | 100000   | 100             | 2.30E+08             | 8.36                        |
| 6.25                            | 19                           | 24 | 26 | 23.00   | 100000   | 100             | 2.30E+08             | 8.36                        |
| 3.13                            | 20                           | 23 | 26 | 23.00   | 100000   | 100             | 2.30E+08             | 8.36                        |
| 1.56                            | 22                           | 24 | 21 | 22.33   | 100000   | 100             | 2.23E+08             | 8.35                        |
| 0.78                            | 18                           | 25 | 23 | 22.00   | 100000   | 100             | 2.20E+08             | 8.34                        |
| 0.39                            | 21                           | 25 | 23 | 23.00   | 100000   | 100             | 2.30E+08             | 8.36                        |

|                                                   | Sample 1 |         |         | Sample 2 |         |         | Sample 3 |         |         | Average<br>(CFU mL <sup>-1</sup> ) | Standard derivation |
|---------------------------------------------------|----------|---------|---------|----------|---------|---------|----------|---------|---------|------------------------------------|---------------------|
| <i>P. pinea</i> L. extract (mg mL <sup>-1</sup> ) | Assay 1  | Assay 2 | Assay 3 | Assay 1  | Assay 2 | Assay 3 | Assay 1  | Assay 2 | Assay 3 |                                    |                     |
| 25                                                | 0        | 0       | 0       | 0        | 0       | 0       | 0        | 0       | 0       | 0                                  | 0                   |
| 12.5                                              | 7.93785  | 7.75333 | 7.60206 | 8.27875  | 8.50060 | 8.31527 | 8.42597  | 8.21307 | 8.36173 | 8.15429                            | 0.31508             |
| 6.25                                              | 8.52720  | 8.40369 | 8.52288 | 8.66276  | 8.70757 | 8.58358 | 8.61630  | 8.32222 | 8.36173 | 8.52310                            | 0.13535             |
| 3.13                                              | 8.52720  | 8.61630 | 8.60924 | 8.61979  | 8.71600 | 8.56820 | 8.75333  | 8.33579 | 8.36173 | 8.56751                            | 0.14191             |
| 1.56                                              | 8.52288  | 8.64345 | 8.61278 | 8.60924  | 8.70757 | 8.56820 | 8.76343  | 8.36173 | 8.34895 | 8.57092                            | 0.14123             |
| 0.78                                              | 8.53991  | 8.65321 | 8.60566 | 8.68425  | 8.71321 | 8.55226 | 8.69020  | 8.34242 | 8.34242 | 8.56928                            | 0.14186             |
| 0.39                                              | 8.53148  | 8.61630 | 8.61278 | 8.71040  | 8.70757 | 8.59106 | 8.69897  | 8.35539 | 8.36173 | 8.57619                            | 0.13705             |

This table represents the mean of the three independent experiments in the three samples studied and their standard deviations.
